# Supplementary material
Source: PubMed Central journal article supplement (PMC7523244)
Supplement: NIHMS1623777-supplement-SM.pdf [file NIHMS1623777-supplement-SM.pdf]

## Supplementary Appendix

This appendix has been provided by the authors to give readers additional information about their work.

Supplement to: Abou-Alfa GK, Meyer T, Cheng A-L, et al. Cabozantinib in patients with advanced and progressing hepatocellular carcinoma. *N Engl J Med* 2018;379:54-63. DOI: [10.1056/NEJMoa1717002](https://doi.org/10.1056/NEJMoa1717002)

**SUPPLEMENTARY APPENDIX**

Abou-Alfa GK, Meyer T, Cheng LI, et al. Cabozantinib versus placebo in previously treated patients with advanced hepatocellular carcinoma.

**Table of Contents**

Study Investigators .....2  
Inclusion and Exclusion Criteria.....3  
Table S1. Baseline Characteristics In Detail.....6  
Table S2. Kaplan-Meier Landmark Estimates of Overall Survival.....9  
Table S3. Subsequent Anticancer Therapy.....9  
Table S4. Tumor Response .....10  
Table S5. Overall Survival and Progression-free Survival in Subgroups.....11  
References.....13

## Study Investigators

The following investigators enrolled patients in CELESTIAL

AUSTRALIA: Mark Danta, Jacob George, Francis Parnis, Siddharth Sood, Simone Strasser, Amany Zekry; BELGIUM: Jean Delwaide, Sven Franque, Bénédicte Petit, Hans Van Vlierberghe; CANADA: Jennifer Knox, Vincent Tam; FRANCE: Armando Abergel, Jean-Frederic Blanc, Jean-Pierre Bronowicki, Stephane Cattan, Chong Hun Kim, Philippe Merle, Héléne Regnault, Albert Tran; GERMANY: Michael Bitzer, Ursula Ehmer, Michael Geissler, Tobias Müller, Jörg Trojan, Marino Venerito; HONG KONG: Stephen Chan, Thomas Yau; IRELAND: David Gallagher; ITALY: Luigi Bolondi, Fabio Farinati, Antonio Gasbarrini, Edoardo Giovanni Giannini, Lorenza Rimassa, Angelo Sangiovanni, Stefano Tamberi, Emiliano Tamburini, Giuseppe Tonini, Vittorina Zagonel; SOUTH KOREA: Jeong Heo, Do Young Kim, Jee Hyun Kim, TaeYou Kim, Ho Yeong Li, Joong Won Park, Baek-Yeol Ryoo; NETHERLANDS: Judith De Vos, Heinz Jozef Klumpen, Susanne Osanto; NEW ZEALAND: Edward J Gane; POLAND: Ewa Janczewska; ROMANIA: Eugeniu Banu, Anca Mihailov; SINGAPORE: Cheng Ean Chee, Su Pin Choo, Siew Wei Wong; SPAIN: Luis Cabezon-Guiterrez, Carlos Gomez Martin, Ana Matilla Peña, Andres Muñoz, Ana Ruiz Casado; TAIWAN: Yee Chao, Yen Hsun Chen, Zhong Zhe Lin, Sheng-Shun Yang, Chia-Jui Yen; TURKEY: Irfan Cicin, Havva Yesil Cinkir; UNITED KINGDOM: Richard Hubner, Yuk Ting Ma, Tim Meyer, Daniel Palmer, Debashis Sarker; UNITED STATES OF AMERICA: Ghassan Abou-Alfa, Steven Alberts, Vasileios Assikis, Ari Baron, Fadi Braiteh, Roniel Cabrera, Arvind Chaudhry, Anthony El Khoueiry, Michael Fanucchi, January Fields-Meehan, Philip Gold, William Harris, Zeid Kayali, Robin Kelley, Gulam Manji, Rebecca Miksad, John Nemunaitis, Francis Nugent, Manish Sharma, David Tamura, Benjamin Tan

## Inclusion and Exclusion Criteria

### Inclusion Criteria

1. Histological or cytological diagnosis of HCC (results of a previous biopsy were accepted)
  2. The subject had disease that was not amenable to a curative treatment approach (eg, transplant, surgery, radiofrequency ablation)
  3. Received prior sorafenib
  4. Progression following at least 1 prior systemic treatment for HCC
  5. Recovery to  $\leq$  Grade 1 from toxicities related to any prior treatments, unless the AEs were clinically nonsignificant and/or stable on supportive therapy
  6. Age  $\geq$  18 years old on the day of consent
  7. Eastern Cooperative Oncology Group performance status (ECOG PS) of 0 or 1
  8. Adequate hematologic function, based upon meeting the following laboratory criteria within 7 days before randomization:
    - a. Absolute neutrophil count (ANC)  $\geq$  1200/mm<sup>3</sup> ( $\geq$  1.2  $\times$  10<sup>9</sup>/L)
    - b. Platelets  $\geq$  60,000/mm<sup>3</sup> ( $\geq$  60  $\times$  10<sup>9</sup>/L)
    - c. Hemoglobin  $\geq$  8 g/dL ( $\geq$  80 g/L)
  9. Adequate renal function, based upon meeting the following laboratory criteria within 7 days before randomization:
    - a. Serum creatinine  $\leq$  1.5  $\times$  upper limit of normal (ULN) or calculated creatinine clearance  $\geq$  40 mL/min using the Cockcroft-Gault equation:  $(140 - \text{age}) \times \text{weight (kg)} / (\text{serum creatinine} \times 72 \text{ [mg/dL]})$  for males. (For females multiplied by 0.85)
- AND
- b. Urine protein/creatinine ratio (UPCR)  $\leq$  1 mg/mg ( $\leq$  113.1 mg/mmol) or 24-hour urine protein  $<$  1 g
10. Child-Pugh Score of A
  11. Total bilirubin  $\leq$  2 mg/dL ( $\leq$  34.2  $\mu$ mol/L) within 7 days before randomization
  12. Serum albumin  $\geq$  2.8 g/dL ( $\geq$  28 g/L) within 7 days before randomization
  13. Alanine aminotransferase (ALT) and aspartate aminotransferase (AST)  $<$  5.0  $\times$  ULN within 7 days before randomization
  14. Hemoglobin A1c (HbA1c)  $\leq$  8% within 28 days before randomization (if HbA1c results were unavailable [eg, hemoglobin variant], a fasting serum glucose  $\leq$  160 mg/dL)
  15. Antiviral therapy per local standard of care if active hepatitis B virus (HBV) infection
  16. Capable of understanding and complying with the protocol requirements and signed informed consent
  17. Sexually active fertile subjects and their partners must have agreed to use medically accepted methods of contraception (eg, barrier methods, including male condom, female condom, or diaphragm with spermicidal gel) during the course of the study and for 4 months after the last dose of study treatment

18. Female subjects of childbearing potential must not have been pregnant at screening. Females of childbearing potential were defined as premenopausal females capable of becoming pregnant (ie, females who had any evidence of menses in the past 12 months, with the exception of those who had prior hysterectomy). However, women who had been amenorrheic for 12 or more months were still considered to be of childbearing potential if the amenorrhea was possibly due to prior chemotherapy, antiestrogens, ovarian suppression, low body weight, or other reasons.

#### Exclusion Criteria

1. Fibrolamellar carcinoma or mixed hepatocellular cholangiocarcinoma
2. Receipt of more than 2 prior systemic therapies for advanced HCC. Additional prior systemic therapies used as adjuvant or local therapy were allowed.
3. Any type of anticancer agent (including investigational) within 2 weeks before randomization
4. Radiation therapy within 4 weeks (2 weeks for radiation for bone metastases) or radionuclide treatment (eg, I-131 or Y-90) within 6 weeks of randomization (subject was excluded if there were any clinically relevant ongoing complications from prior radiation therapy)
5. Prior cabozantinib treatment
6. Known brain metastases or cranial epidural disease unless adequately treated with radiotherapy and/or surgery (including radiosurgery) and stable for at least 3 months before randomization. Eligible subjects must have been without corticosteroid treatment at the time of randomization.
7. Concomitant anticoagulation, at therapeutic doses, with anticoagulants such as warfarin or warfarin-related agents, low molecular weight heparin (LMWH), thrombin or coagulation factor X (FXa) inhibitors, or antiplatelet agents (eg, clopidogrel). Low dose aspirin for cardioprotection (per local applicable guidelines), low-dose warfarin ( $\leq 1$  mg/day), and low-dose LMWH were permitted.
8. The subject had uncontrolled, significant intercurrent or recent illness including, but not limited to, the following conditions:
  - a. Cardiovascular disorders including
    - i. Symptomatic congestive heart failure, unstable angina pectoris, or serious cardiac arrhythmias
    - ii. Uncontrolled hypertension defined as sustained blood pressure (BP)  $> 150$  mm Hg systolic BP (SBP), or  $> 100$  mm Hg diastolic BP (DBP) despite optimal antihypertensive treatment
    - iii. Stroke (including transient ischemic attack), myocardial infarction, or other ischemic event within 6 months before randomization
    - iv. Thromboembolic event within 3 months before randomization. Subjects with thromboses of portal/hepatic vasculature attributed to underlying liver disease and/or liver tumor were eligible
  - b. Gastrointestinal (GI) disorders including those associated with a high risk of perforation or fistula formation:
    - i. Tumors invading the GI tract, active peptic ulcer disease, inflammatory bowel disease (eg, Crohn's disease), diverticulitis, cholecystitis, symptomatic cholangitis or appendicitis, acute pancreatitis or acute obstruction of the pancreatic duct or common bile duct, or gastric outlet obstruction

- ii. Abdominal fistula, GI perforation, bowel obstruction, intra-abdominal abscess within 6 months before randomization

Note: Complete healing of an intra-abdominal abscess must have been confirmed prior to randomization

- c. Major surgery within 2 months before randomization. Complete healing from major surgery must have occurred 1 month before randomization. Complete healing from minor surgery (eg, simple excision, tooth extraction) must have occurred at least 7 days before randomization. Subjects with clinically relevant complications from prior surgery were not eligible
  - d. Cavitating pulmonary lesion(s) or endobronchial disease
  - e. Lesion invading a major blood vessel including, but not limited to: inferior vena cava, pulmonary artery, or aorta. Subjects with lesions invading the portal vasculature were eligible.
  - f. Clinically significant bleeding risk including the following within 3 months of randomization: hematuria, hematemesis, hemoptysis of > 0.5 teaspoon (> 2.5 mL) of red blood, or other signs indicative of pulmonary hemorrhage, or history of other significant bleeding if not due to reversible external factors
  - g. Other clinically significant disorders such as:
    - i. Active infection requiring systemic treatment, known infection with human immunodeficiency virus (HIV), or known acquired immunodeficiency syndrome (AIDS)-related illness. Subjects with active hepatitis virus infection controlled with antiviral therapy were eligible.
    - ii. Serious non-healing wound/ulcer/bone fracture
    - iii. Malabsorption syndrome
    - iv. Uncompensated/symptomatic hypothyroidism
    - v. Requirement for hemodialysis or peritoneal dialysis
    - vi. History of solid organ transplantation
9. Subjects with untreated or incompletely treated varices with bleeding or high risk for bleeding. Subjects treated with adequate endoscopic therapy (in accordance with institutional standards) without any episodes of recurrent GI bleeding requiring transfusion or hospitalization for at least 6 months prior to study entry were eligible.
10. Moderate or severe ascites
11. Corrected QT interval calculated by the Fridericia formula (QTcF) > 500 ms within 7 days before randomization
- Note: If the QTcF was > 500 ms in the first ECG, a total of 3 ECGs were to be performed. If the average of these 3 consecutive results for QTcF was ≤ 500 ms, the subject met eligibility in this regard.
12. Inability to swallow tablets
13. Previously identified allergy or hypersensitivity to components of the study treatment formulations
14. Pregnant or lactating females
15. Diagnosis of another malignancy within 2 years before randomization, except for superficial skin cancers, or localized, low-grade tumors deemed cured and not treated with systemic therapy

**Table S1. Baseline Characteristics In Detail**

|                                         | <b>Cabozantinib<br/>(N = 470)</b> | <b>Placebo<br/>(N = 237)</b> |
|-----------------------------------------|-----------------------------------|------------------------------|
| Age, median (range), years              | 64 (22-86)                        | 64 (24-86)                   |
| Sex, n (%)                              |                                   |                              |
| Male                                    | 379 (81)                          | 202 (85)                     |
| Female                                  | 91 (19)                           | 35 (15)                      |
| Geographic region, n (%)                |                                   |                              |
| Asia*                                   | 116 (25)                          | 59 (25)                      |
| Europe                                  | 231 (49)                          | 108 (46)                     |
| North America (Canada/United States)    | 108 (23)                          | 59 (25)                      |
| Australia/New Zealand                   | 15 (3)                            | 11 (5)                       |
| Race, n (%) <sup>†</sup>                |                                   |                              |
| White                                   | 264 (56)                          | 130 (55)                     |
| Asian                                   | 159 (34)                          | 82 (35)                      |
| Black                                   | 8 (2)                             | 11 (5)                       |
| Other                                   | 8 (2)                             | 2 (1)                        |
| Not reported                            | 31 (7)                            | 12 (5)                       |
| ECOG performance status, n (%)          |                                   |                              |
| 0                                       | 245 (52)                          | 131 (55)                     |
| 1                                       | 224 (48)                          | 106 (45)                     |
| 2 <sup>‡</sup>                          | 1 (<1)                            | 0                            |
| Etiology of disease, n (%) <sup>§</sup> |                                   |                              |
| HBV                                     | 178 (38)                          | 89 (38)                      |
| HCV                                     | 113 (24)                          | 55 (23)                      |
| Dual HBV and HCV infection              | 8 (2)                             | 4 (2)                        |
| Alcohol_                                | 112 (24)                          | 39 (16)                      |
| Nonalcoholic steatohepatitis            | 43 (9)                            | 23 (10)                      |
| Other                                   | 24 (5)                            | 16 (7)                       |
| Unknown                                 | 75 (16)                           | 47 (20)                      |
| Child-Pugh class, n (%)                 |                                   |                              |
| A                                       | 462 (98)                          | 235 (99)                     |
| B <sup>‡</sup>                          | 7 (1)                             | 2 (1)                        |
| Missing                                 | 1 (<1)                            | 0                            |
| BCLC stage, n (%) <sup>  </sup>         |                                   |                              |

|                                                                      | <b>Cabozantinib<br/>(N = 470)</b> | <b>Placebo<br/>(N = 237)</b> |
|----------------------------------------------------------------------|-----------------------------------|------------------------------|
| B (intermediate)                                                     | 42 (9)                            | 23 (10)                      |
| C (advanced)                                                         | 427 (91)                          | 214 (90)                     |
| Extrahepatic spread of disease, n (%)                                | 369 (79)                          | 182 (77)                     |
| Macrovascular invasion, n (%)                                        | 129 (27)                          | 81 (34)                      |
| Extrahepatic spread of disease and/or macrovascular invasion, n (%)  | 398 (85)                          | 200 (84)                     |
| Sites of disease, n (%)                                              |                                   |                              |
| Liver**                                                              | 395 (84)                          | 216 (91)                     |
| Bone                                                                 | 60 (13)                           | 34 (14)                      |
| Visceral (excluding liver)                                           | 215 (46)                          | 105 (44)                     |
| Lung                                                                 | 184 (39)                          | 91 (38)                      |
| Adrenal gland                                                        | 51 (11)                           | 24 (10)                      |
| Lymph Node                                                           | 155 (33)                          | 71 (30)                      |
| Number of sites (including liver)                                    |                                   |                              |
| 1                                                                    | 144 (31)                          | 72 (30)                      |
| 2                                                                    | 172 (37)                          | 91 (38)                      |
| ≥3                                                                   | 154 (33)                          | 74 (31)                      |
| Alpha-fetoprotein (ng/mL), n (%)                                     |                                   |                              |
| < 400                                                                | 278 (59)                          | 136 (57)                     |
| ≥ 400                                                                | 192 (41)                          | 101 (43)                     |
| Number of prior systemic anticancer regimens for advanced HCC, n (%) |                                   |                              |
| 0 <sup>†</sup>                                                       | 3 (1)                             | 0                            |
| 1                                                                    | 335 (71)                          | 174 (73)                     |
| 2                                                                    | 130 (28)                          | 62 (26)                      |
| ≥3                                                                   | 2 (<1)                            | 1 (<1)                       |
| Prior systemic anticancer therapy, n (%)                             |                                   |                              |
| Sorafenib                                                            | 470 (100)                         | 237 (100)                    |
| Regorafenib                                                          | 6 (1)                             | 2 (1)                        |
| Lenvatinib                                                           | 0                                 | 1 (<1)                       |
| Tivantinib                                                           | 1 (<1)                            | 2 (1)                        |
| Ramucirumab                                                          | 8 (2)                             | 1 (<1)                       |
| Anti-PD-1/PD-L1                                                      | 14 (3)                            | 3 (1)                        |

|                                                                                                                  | <b>Cabozantinib<br/>(N = 470)</b> | <b>Placebo<br/>(N = 237)</b> |
|------------------------------------------------------------------------------------------------------------------|-----------------------------------|------------------------------|
| Cytotoxic chemotherapy                                                                                           | 41 (9)                            | 30 (13)                      |
| Doxorubicin                                                                                                      | 22 (5)                            | 10(4)                        |
| Investigational agent                                                                                            | 60 (13)                           | 20 (8)                       |
| Local liver-directed non-radiation anticancer therapy, n (%)                                                     | 209 (44)                          | 113 (48)                     |
| Time from initial pathologic diagnosis of HCC to randomization, median, years                                    | 1.5                               | 1.3                          |
| Total duration of treatment on prior sorafenib, median, months <sup>#</sup>                                      | 5.3                               | 4.8                          |
| Time from the end of most recent systemic anticancer agent for HCC to randomization, median, months <sup>#</sup> | 1.4                               | 1.2                          |

BCLC, Barcelona Clinic Liver Cancer; HCC, hepatocellular carcinoma; PD-1, programmed death-1; PD-L1, programmed death-ligand 1.

Significant differences between treatment groups are indicated by \_ for P < 0.05 and \*\* for P < 0.01.

\*Asia included Hong Kong, South Korea, Singapore, and Taiwan.

†Race was self reported by the patients.

‡Although patients were required to have ECOG performance status of 0 or 1 and Child-Pugh class A, a few patients had ECOG performance status of 2 or Child-Pugh class B.

§Etiology per case report form. Some patients had more than one disease etiology category.

¶BCLC status<sup>1</sup> was assigned retrospectively, using macrovascular invasion as a surrogate for portal vein invasion. One patient in the cabozantinib group had unknown BCLC status.

¶¶Three subjects in the cabozantinib group received prior systemic anticancer therapy that was administered for adjuvant treatment but not for advanced hepatocellular carcinoma treatment.

#Time from initial pathologic diagnosis of HCC to randomization missing for 1 patient in the cabozantinib group and 2 patients in the placebo group. Total duration of treatment on prior sorafenib missing for 1 patient in the cabozantinib group.

**Table S2. Kaplan-Meier Landmark Estimates of Overall Survival**

| Landmark  | Estimate of % of Patients Alive (95% CI) |                      |
|-----------|------------------------------------------|----------------------|
|           | Cabozantinib<br>(N = 470)                | Placebo<br>(N = 237) |
| 6 months  | 72 (67-76)                               | 61 (54-67)           |
| 12 months | 46 (41-50)                               | 34 (28-41)           |
| 18 months | 32 (27-37)                               | 18 (12-24)           |
| 24 months | 18 (14-22)                               | 13 (8-18)            |

CI, confidence interval.

**Table S3. Subsequent Anticancer Therapy**

|                                                                              | Cabozantinib<br>(N=470) | Placebo<br>(N=237) |
|------------------------------------------------------------------------------|-------------------------|--------------------|
| Any non-radiation systemic or local liver-directed anticancer therapy, n (%) | 123 (26)                | 78 (33)            |
| Any systemic anticancer therapy, %                                           | 117 (25)                | 70 (30)            |
| Sorafenib                                                                    | 19 (4)                  | 4 (2)              |
| Regorafenib                                                                  | 11 (2)                  | 3 (1)              |
| Anti-PD-1/PD-L1                                                              | 23 (5)                  | 15 (6)             |
| Lenvatinib                                                                   | 1 (<1)                  | 0                  |
| Cytotoxic chemotherapy                                                       | 57 (12)                 | 40 (17)            |
| Investigational agent                                                        | 28 (6)                  | 17 (7)             |
| Any non-radiation local liver-directed anticancer therapy, n (%)             | 15 (3)                  | 13 (5)             |

PD-1, programmed death-1; PD-L1, programmed death-ligand 1.

**Table S4. Tumor Response**

|                                                    | <b>Cabozantinib<br/>(N = 470)</b> | <b>Placebo<br/>(N = 237)</b> |
|----------------------------------------------------|-----------------------------------|------------------------------|
| Objective response rate, % (95% CI) <sup>*,†</sup> | 4 (2 - 6)                         | <1 (0 - 2)                   |
| Best overall response, n (%)                       |                                   |                              |
| Complete response                                  | 0                                 | 0                            |
| Partial response                                   | 18 (4)                            | 1 (<1)                       |
| Stable disease                                     | 282 (60)                          | 78 (33)                      |
| Progressive disease                                | 98 (21)                           | 131 (55)                     |
| Not evaluable or missing                           | 72 (15)                           | 27 (11)                      |

Tumor response was assessed by investigator per RECIST version 1.1.

\*Confirmed complete and partial responses

†P = 0.009 (Cochran-Mantel-Haenszel test)

**Table S5. Overall Survival and Progression-free Survival in Subgroups**

|                           | No. patients |     | Overall Survival |                |                  | Progression-free Survival |                 |                  |
|---------------------------|--------------|-----|------------------|----------------|------------------|---------------------------|-----------------|------------------|
|                           | Cabo         | Pbo | mOS<br>cabo, mo  | mOS<br>pbo, mo | HR (95% CI)      | mPFS<br>cabo, mo          | mPFS<br>pbo, mo | HR (95% CI)      |
| Overall                   | 470          | 237 | 10.2             | 8.0            | 0.76 (0.63-0.92) | 5.2                       | 1.9             | 0.44 (0.36-0.52) |
| Age                       |              |     |                  |                |                  |                           |                 |                  |
| <65                       | 240          | 124 | 9.6              | 7.7            | 0.81 (0.62-1.05) | 5.0                       | 1.9             | 0.45 (0.35-0.57) |
| ≥65                       | 230          | 113 | 11.1             | 8.3            | 0.74 (0.56-0.97) | 5.4                       | 2.0             | 0.46 (0.35-0.59) |
| Sex                       |              |     |                  |                |                  |                           |                 |                  |
| Male                      | 379          | 202 | 10.1             | 7.9            | 0.79 (0.64-0.97) | 4.9                       | 1.9             | 0.49 (0.40-0.59) |
| Female                    | 91           | 35  | 11.1             | 8.9            | 0.68 (0.42-1.09) | 5.5                       | 1.9             | 0.31 (0.20-0.49) |
| ECOG PS                   |              |     |                  |                |                  |                           |                 |                  |
| 0                         | 245          | 131 | 12.4             | 9.3            | 0.69 (0.53-0.89) | 5.6                       | 1.9             | 0.39 (0.31-0.50) |
| 1                         | 224          | 106 | 8.6              | 6.4            | 0.87 (0.66-1.14) | 3.7                       | 1.9             | 0.54 (0.41-0.70) |
| AFP                       |              |     |                  |                |                  |                           |                 |                  |
| <400 ng/mL                | 278          | 136 | 13.9             | 10.3           | 0.81 (0.62-1.04) | 5.5                       | 1.9             | 0.47 (0.37-0.60) |
| ≥400 ng/mL                | 192          | 101 | 8.5              | 5.2            | 0.71 (0.54-0.94) | 3.9                       | 1.9             | 0.42 (0.32-0.55) |
| Region                    |              |     |                  |                |                  |                           |                 |                  |
| Asia                      | 116          | 59  | 10.9             | 10.2           | 1.01 (0.68-1.48) | 5.4                       | 1.8             | 0.46 (0.32-0.67) |
| Other Regions             | 354          | 178 | 10.2             | 7.8            | 0.71 (0.57-0.88) | 5.2                       | 1.9             | 0.45 (0.37-0.56) |
| Race                      |              |     |                  |                |                  |                           |                 |                  |
| Asian                     | 159          | 82  | 9.7              | 8.5            | 0.86 (0.63-1.19) | 5.4                       | 1.8             | 0.43 (0.32-0.58) |
| Non-Asian                 | 280          | 143 | 11.1             | 7.9            | 0.75 (0.59-0.96) | 5.2                       | 1.9             | 0.47 (0.38-0.59) |
| EHS and/or MVI            |              |     |                  |                |                  |                           |                 |                  |
| Yes                       | 398          | 200 | 9.5              | 7.3            | 0.73 (0.60-0.90) | 5.0                       | 1.9             | 0.45 (0.37-0.54) |
| No                        | 72           | 37  | 14.0             | 14.7           | 0.99 (0.59-1.65) | 5.6                       | 2.0             | 0.46 (0.29-0.74) |
| EHS                       |              |     |                  |                |                  |                           |                 |                  |
| Yes                       | 369          | 182 | 9.6              | 6.9            | 0.72 (0.58-0.89) | 5.0                       | 1.9             | 0.46 (0.37-0.56) |
| No                        | 101          | 55  | 12.0             | 12.3           | 0.96 (0.63-1.46) | 5.4                       | 1.9             | 0.45 (0.31-0.66) |
| MVI                       |              |     |                  |                |                  |                           |                 |                  |
| Yes                       | 129          | 81  | 7.6              | 5.3            | 0.75 (0.54-1.03) | 3.7                       | 1.8             | 0.42 (0.31-0.58) |
| No                        | 339          | 156 | 12.4             | 9.7            | 0.80 (0.64-1.01) | 5.5                       | 1.9             | 0.48 (0.38-0.59) |
| Etiology                  |              |     |                  |                |                  |                           |                 |                  |
| HBV (with or without HCV) | 178          | 89  | 9.7              | 6.1            | 0.69 (0.51-0.94) | 4.4                       | 1.8             | 0.31 (0.23-0.42) |
| HCV (without HBV)         | 105          | 51  | 11.1             | 11.4           | 1.11 (0.72-1.71) | 4.1                       | 1.9             | 0.61 (0.42-0.88) |

|                                                                                                                                                                                                                                                                                                                                                                                                                                                                                                                                                                                                                                                                                                                                                                                                                                                                                                                                                                                                                                      | No. patients |     | Overall Survival |                |                  | Progression-free Survival |                 |                  |
|--------------------------------------------------------------------------------------------------------------------------------------------------------------------------------------------------------------------------------------------------------------------------------------------------------------------------------------------------------------------------------------------------------------------------------------------------------------------------------------------------------------------------------------------------------------------------------------------------------------------------------------------------------------------------------------------------------------------------------------------------------------------------------------------------------------------------------------------------------------------------------------------------------------------------------------------------------------------------------------------------------------------------------------|--------------|-----|------------------|----------------|------------------|---------------------------|-----------------|------------------|
|                                                                                                                                                                                                                                                                                                                                                                                                                                                                                                                                                                                                                                                                                                                                                                                                                                                                                                                                                                                                                                      | Cabo         | Pbo | mOS<br>cabo, mo  | mOS<br>pbo, mo | HR (95% CI)      | mPFS<br>cabo, mo          | mPFS<br>pbo, mo | HR (95% CI)      |
| Other                                                                                                                                                                                                                                                                                                                                                                                                                                                                                                                                                                                                                                                                                                                                                                                                                                                                                                                                                                                                                                | 187          | 97  | 11.1             | 8.7            | 0.72 (0.54-0.96) | 5.5                       | 2.0             | 0.48 (0.36-0.63) |
| Prior systemic anticancer regimens for advanced HCC                                                                                                                                                                                                                                                                                                                                                                                                                                                                                                                                                                                                                                                                                                                                                                                                                                                                                                                                                                                  |              |     |                  |                |                  |                           |                 |                  |
| One                                                                                                                                                                                                                                                                                                                                                                                                                                                                                                                                                                                                                                                                                                                                                                                                                                                                                                                                                                                                                                  | 335          | 174 | 11.4             | 7.7            | 0.74 (0.59-0.92) | 5.5                       | 1.9             | 0.43 (0.35-0.52) |
| Two                                                                                                                                                                                                                                                                                                                                                                                                                                                                                                                                                                                                                                                                                                                                                                                                                                                                                                                                                                                                                                  | 130          | 62  | 8.6              | 8.6            | 0.90 (0.63-1.29) | 3.7                       | 1.9             | 0.58 (0.41-0.83) |
| <p>AFP, <math>\alpha</math>-fetoprotein; cabo, cabozantinib; CI, confidence interval; ECOG PS, Eastern Cooperative Oncology Group performance status; EHS, extrahepatic spread; HCC, hepatocellular carcinoma; HR, hazard ratio; mOS, median overall survival; mPFS, median progression-free survival; MVI, macrovascular invasion; pbo, placebo.</p> <p>Hazard ratios are stratified for the overall population and unstratified for the subgroups. One patient in cabozantinib group had ECOG performance status 2.</p> <p>Thirty-one patients in the cabozantinib group and 12 patients in the placebo group had no race reported.</p> <p>Two patients in the cabozantinib group had unknown MVI status.</p> <p>Three patients in the cabozantinib group received prior systemic anticancer therapy that was administered for adjuvant treatment but not for advanced hepatocellular carcinoma treatment, and 2 patients in the cabozantinib group and 1 patient in the placebo group had <math>\geq 3</math> prior regimens.</p> |              |     |                  |                |                  |                           |                 |                  |

## References

1. Bruix J, Sherman M. Management of hepatocellular carcinoma: an update. *Hepatology* 2011;53:1020-2.
